# Supplementary material
Source: Research Square preprint supplement (doi:10.21203/rs.3.rs-9114574/v1)
Supplement: Supplementary file 1 [file 924a26461284fd53789a9a0a.docx]

**Table 1. Baseline characteristics in type 2 diabetic parameters with or without** **cardiovascular disease**

| **Variable** | **Category** | **Control** | **Type 2 Diabetic patients** | | ***P*-value** |
| --- | --- | --- | --- | --- | --- |
| **Non-CVD group** | **CVD group** |
| **%** | **%** | **%** |
| **Gender** | Male | 66.0 | 50.0 | 52.0 | 0.046 |
| Female | 34.0 | 50.0 | 48.0 |
| **Age** | 40-45 | 14.0 | 11.0 | 6.0 | 0.001 |
| 46-52 | 47.0 | 27.0 | 29.0 |
| 53-59 | 31.0 | 48.0 | 35.0 |
| 60-70 | 8.0 | 14.0 | 30.0 |
| **Education** | Secondary | 42.0 | 57.0 | 46.0 | 0.035 |
| University | 58.0 | 43.0 | 54.0 |
| **Hospital refers** | Al Shefa | 35.0 | 35.0 | 35.0 | 0.08 |
| Al Aqsa | 25.0 | 25.0 | 25.0 |
| European | 20.0 | 20.0 | 20.0 |
| Naser | 20.0 | 20.0 | 20.0 |
| **Durations of DM (years)** | 0-4 | - | 36.0 | 21.0 | 0.001 |
| 5-10 | - | 37.0 | 41.0 |
| 11-30 | - | 27.0 | 38.0 |
| **DM complications** | HF | - | - | 10.0 | 0.001 |
| IHD | - | - | 62.0 | 0.001 |
| AS | - | - | 12.0 |
| CVA | - | - | 16.0 |
| **Smoking** | Smoker | 41 | 42 | 41 | 0.98 |
| Nonsmoker | 49 | 58 | 59 |
| **DM treatments** | Insulin | - | 2.0 | 5.0 | 0.001 |
| OAD | - | 98.0 | 95.0 |
| **Hyperlipidemia treatment** | Yes | - | 15.0 | 94.0 | 0.001 |
| No | - | 85.0 | 6.0 |

DM: Type 2 diabetes mellites; CVD: cardiovascular disease; HF: Heart failure; IHD: ischemic heart disease; AS: Atherosclerosis; CVA Cerebrovascular accident; OAD: oral anti diabetic drugs.

Each reading represents Mean ±SD of 100 subjects.

The significant of difference was checked by checked by chi square test, significant at *P* ≤ 0.05.

**Table 2.** **Lp(a) and Hs.CRP parameters of the study population**

| **Parameter** | **Control** | **Type 2 Diabetic patients** | | **% Change** | ***P*-value** |
| --- | --- | --- | --- | --- | --- |
| **Non-CVD group** | **CVD group** |
| **Lp(a) (mg/dl)** | 9.5 ± 4.9 | 36.3±2.9*, a | 50.1±3.5*, a, b | 282.0  427.0  38.0 | 0.001 |
| **Hs.CRP (mg/dl)** | 1.8±0.87 | 10.1±0.96*, a | 11.1±0.96 *, a | 461.0  517.0  10.0 | 0.001 |

Lp(a): Lipoprotein (a), High sensitive C-reactive protein.

Each reading represents Mean ±SD of 100 subjects, the significant of difference was checked by one-way ANOVA test, Pot Hoc test - Scheffe test, * significant at *P* ≤ 0.05.

a Compares compare all vs. control, b Compares CVD group with non-CVD in type 2 diabetic.

**Table 3.** **Glucose and Lipid profile of the study population**

| **Parameter** | **Control** | **Type 2 Diabetic patients** | | **% Change** | ***P*-value** |
| --- | --- | --- | --- | --- | --- |
| **Non-CVD group** | **CVD group** |
| **Glucose (mg/dl)** | 88.0 ± 7.2 | 205.9± 8.2*, a | 167.0±7.4*, a, b | 134.0  90.0  -19.0 | 0.001 |
| **Cholesterol (mg/dl)** | 162.3±1.8 | 205.1±5.9*, a | 194.8±6.6*, a | 26.0  20  -5.0 | 0.001 |
| **Triglyceride (mg/dl)** | 166.6±1.7 | 235.4±9.8 *, a | 214.8±9.8*, a | 41.0  29.0  -9.0 | 0.001 |
| **HDL-C (mg/dl)** | 40.2±2.6 | 35.7±4.6*, a | 36.5±4.8*, a | -11.0  -9.0  2.0 | 0.001 |
| **LDL-C (mg/dl)** | 89.3±1.7 | 125.4±6.1*, a | 116.6±6.2*, a | 40.0  31.0  -7.0 | 0.001 |

HDL-C: High-density lipoprotein cholesterol; LDL-C: Low density lipoprotein cholesterol.

Each reading represents Mean ±SD of 100 subjects.

Each reading represents Mean ±SD of 100 subjects, the significant of difference was checked by one-way ANOVA test, Pot Hoc test - Scheffe test, * significant at *P* ≤ 0.05.

a Compares compare all vs. control, b Compares CVD group with non-CVD in type 2 diabetic.

**Table 4. Cardiac enzymes levels of study population**

| **Parameter** | **Control** | **Type 2 Diabetic patients** | | **% Change** | ***P*-value** |
| --- | --- | --- | --- | --- | --- |
| **Non-CVD group** | **CVD group** |
| **CPK** IU/ml | 92.3±3.7 | 108.0±6.4*, a | 123.1±8.1*, a | 17.0  33.0  14.0 | 0.003 |
| **LDH** IU/ml | 293.0±11.0 | 398.2±16.6*, a | 481.0±17.8*, a, b | 36.0  64.0  21.0 | 0.001 |
| **AST** IU/ml | 20.7±6.3 | 30.3±5.8*, a | 25.7±2.0*, a | 46.0  24.0  -15.0 | 0.169 |

CPK: creatine phosphokinase; LDH: Lactate dehydrogenase; AST: aspartate aminotransferase.

Each reading represents Mean ±SD of 100 subjects.

Each reading represents Mean ±SD of 100 subjects, the significant of difference was checked by one-way ANOVA test, Pot Hoc test - Scheffe test, * significant at *P* ≤ 0.05.

a Compares compare all vs. control, b Compares CVD group with non-CVD in type 2 diabetic.

**Table** **5.** **The** **correlation** **of Lp(a) with** **study parameters**

| **Parameters** | **Lp(a) (mg/dl)** | |
| --- | --- | --- |
| **Pearson correlation (r)** | ***P*-value** |
| FBG(mg/dl) | 0.222 | 0.001 |
| TC (mg/dl) | 0.265 | 0.001 |
| TG (mg/dl) | 0.153 | 0.004 |
| HD L(mg/dl) | -.0311 | 0.001 |
| LDL (mg/dl) | 0.254 | 0.001 |
| CPK (mg/dl) | 0. 155 | 0.004 |
| LDH (mg/dl) | 0.261 | 0.001 |

FBG: Fasting blood glucose; TC: cholesterol; TG: Triglyceride, HDL-C: High-density lipoprotein cholesterol; LDL-C: Low-density lipoprotein cholesterol; CPK: creatine phosphokinase; LDH: Lactate dehydrogenase.

* Correlation is significant at the 0.05 level (2-tailed).
